# Supplementary material for: Phase-controlled field-effect micromixing using AC electroosmosis
Source: PubMed Central journal article supplement (PMC8433414; doi:10.1038/s41378-020-0166-y), 2020-07-27
Supplement: 41378_2020_166_MOESM3_ESM.pdf [file 41378_2020_166_MOESM3_ESM.pdf]

# **Phase-Controlled Field-Effect Micromixing Using AC Electroosmosis**

Paresa Modarres and Maryam Tabrizian\*

Biomedical Engineering Department, Faculty of Medicine, McGill University, 3775 University  
Street, Montreal, Quebec, Canada H3A 0G4

## **Supporting Information**

\*Corresponding author at:

Department of Biomedical Engineering, Faculty of Medicine, McGill University, 3775 University  
Street, Montreal, Quebec H3A 0G4, Canada.

Tel: 514-398-8129

Email addresses:

[paresa.modarres@mail.mcgill.ca](mailto:paresa.modarres@mail.mcgill.ca) (Paresa Modarres)

[maryam.tabrizian@mcgill.ca](mailto:maryam.tabrizian@mcgill.ca) (Maryam Tabrizian)

## Device geometry

The proposed micromixer consists of a Y-shaped microchannel with three-finger electrodes that are shaped sinusoidally (s-shape) running parallel to the main channel (Fig. S1a). To compare the efficacy of the proposed electrode geometry to that of rectangular-shaped (r-shape) electrodes, a micromixer with straight electrodes (Fig. S1b) was also fabricated and evaluated. For both designs,  $L$ ,  $W$ , and  $H$  correspond to the electrode length, channel width, and channel height, respectively. The gate, source, and drain electrodes widths are designated as  $w_g$ ,  $w_s$ , and  $w_d$ , respectively. The spacing between each electrode pair is  $d$ . The design parameters for the s-shape and r-shape micromixers are listed in Table S1.

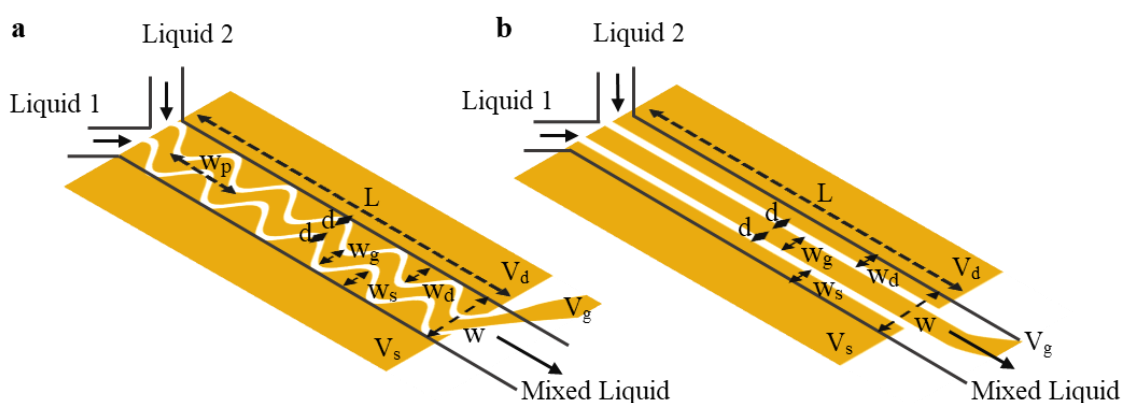

**Figure S1.** a S-shape b and r-shape electrode micromixer design parameters.

**Table S1.** Geometrical parameters for the s-shape and r-shape electrodes and the microfluidic channel.

| Parameter | Value ( $\mu\text{m}$ )<br>S-shape | Value ( $\mu\text{m}$ )<br>R-shape | Description            |
|-----------|------------------------------------|------------------------------------|------------------------|
| $w_g$     | 60                                 | 60                                 | Gate electrode width   |
| $w_d$     | 0 – 60 (variable)                  | 30                                 | Drain electrode width  |
| $w_s$     | 0 – 60 (variable)                  | 30                                 | Source electrode width |
| $w_p$     | 160                                | -                                  | Electrode periodicity  |
| $d$       | 20                                 | 20                                 | Electrode spacing      |
| $w$       | 160                                | 160                                | Channel width          |
| $h$       | 30                                 | 30                                 | Channel height         |
| $L$       | 3000                               | 3000                               | Electrode length       |

## Mixing performance: device geometry

Unlike the majority of prior electrokinetic-based micromixers that encompassed rectangular electrode patterns symmetric to the flow direction, the altering configuration of the sinusoidally shaped electrodes introduces asymmetric vortices with respect to the interface of the incoming fluid streams along the mixing length. To assess the mixing enhancement attained with the sinusoidal electrode geometry, a micromixer with parallel rectangular electrodes was fabricated and characterized (Fig. S1b). All parameters including electrode length, channel width, channel height, electrode spacing, and gate electrode width remained constant for both designs for a proper comparison.

Fig. S2a shows the mixing indices versus frequency for a confluent flow rate of  $4 \mu\text{L}/\text{min}$  and excitation voltages of  $10 \text{ V}_{\text{pp}}$  using biasing scheme 1. As it is observed in this figure, the maximum mixing for the r-shape electrode geometry was obtained at a frequency range of 10-20 kHz. Thus, for the r-shape electrode, the mixing variation with voltage was characterized at 10 kHz and is shown in Fig. S2b. Overall, it can be concluded that in r-shape electrode geometry the mixing was significantly reduced corresponding to an average of 187% decrease in the peak mixing index with the biasing scheme 1.

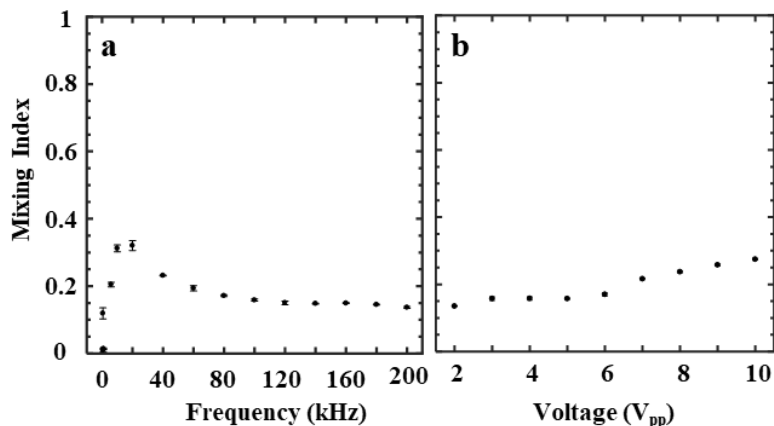



index was evaluated by operating the mixer at the optimized frequency of 1 MHz and a voltage of 10 V<sub>pp</sub>. Fig. S4b shows the mixing performance corresponding to TFR values ranging from 10 μL/min to 400 μL/min at different FRRs.

**Table S2:** Geometrical parameters of the electrodes and the microfluidic channel for the modified platform.

| Parameter      | Value (μm)         | Description            |
|----------------|--------------------|------------------------|
| w <sub>g</sub> | 60                 | Gate electrode width   |
| w <sub>d</sub> | 0 – 120 (variable) | Drain electrode width  |
| w <sub>s</sub> | 0 – 120 (variable) | Source electrode width |
| w <sub>p</sub> | 160                | Electrode periodicity  |
| d              | 20                 | Electrode spacing      |
| w              | 280                | Channel width          |
| h              | 60                 | Channel height         |
| L              | 3000               | Electrode length       |

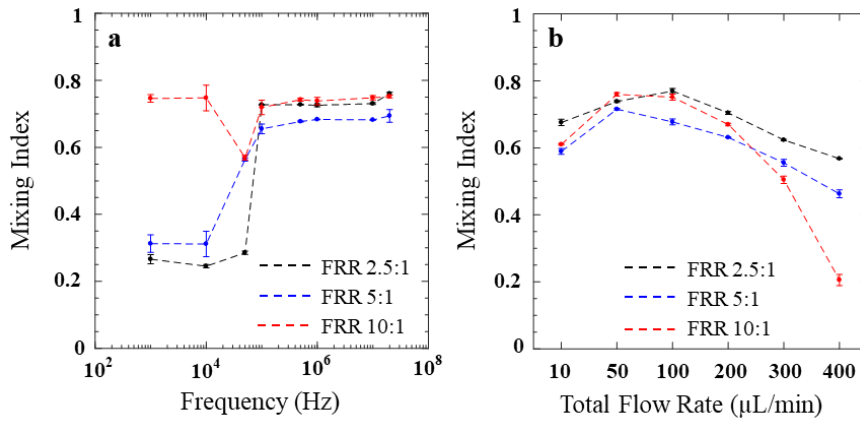

**Figure S4. a** Mixing index versus frequency at different FRRs of DI water to ethanol. (V: 10 V<sub>pp</sub>, TFR: 50 μL/min) **b** Mixing index versus total flow rate at different FRRs of DI water to ethanol. (V: 10 V<sub>pp</sub> at 1 MHz)
